# Supplementary material for: Upregulation of miR-181a impairs hepatic glucose and lipid homeostasis
Source: PubMed Central journal article supplement (PMC5710930; doi:10.18632/oncotarget.20523), 2017-08-24
Supplement: oncotarget-08-91362-s001.pdf [file oncotarget-08-91362-s001.pdf]

## Upregulation of miR-181a impairs hepatic glucose and lipid homeostasis

### SUPPLEMENTARY MATERIALS

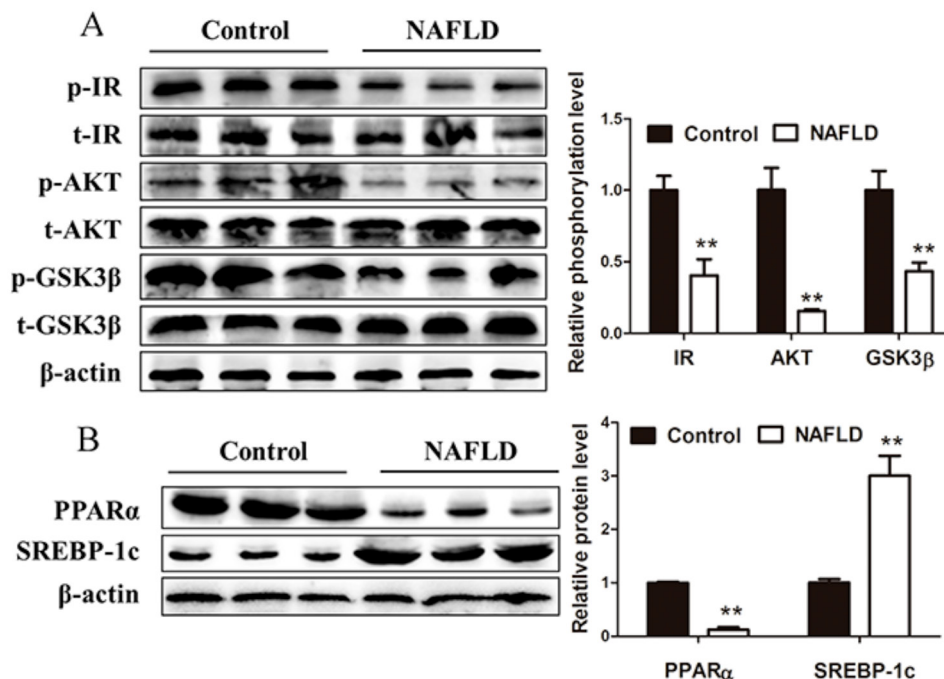

**Supplementary Figure 1: The insulin-related and lipid-related IR/Akt/GSK3β and PPARα/SREBP-1c signaling pathways.** (A) Immunoblot analysis (left) and quantification (right) of insulin-stimulated phosphorylation of IR, Akt, GSK3β protein levels in the liver of dairy cows with NAFLD ( $n = 20$ ) and controls ( $n = 20$ ). (B) Immunoblot analysis (left) and quantification (right) of SREBP-1c and PPARα protein levels in the liver of dairy cows with NAFLD ( $n = 20$ ) and controls ( $n = 20$ ). \* $P < 0.05$ , \*\* $P < 0.01$ . All experiments were repeated at least three times and representative results are shown.

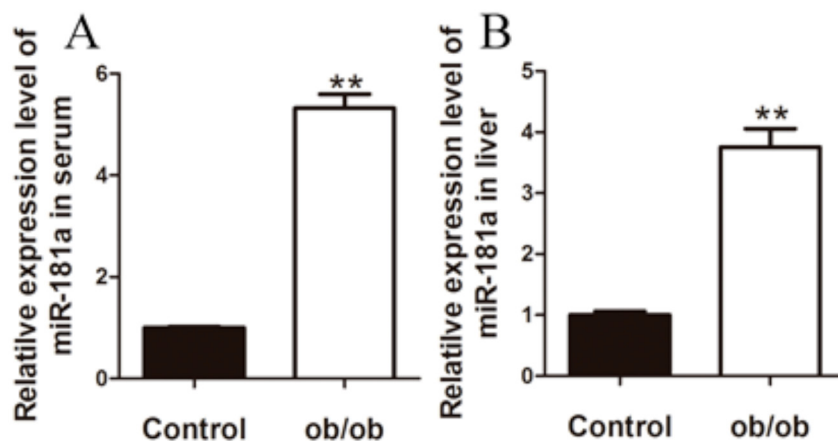

**Supplementary Figure 2: Expression of miR-181a in ob/ob mice.** (A) The expression level of miR-181a in the serum of ob/ob ( $n = 7$ ) and control ( $n = 7$ ) mice. (B) The expression level of miR-181a in the liver of ob/ob ( $n = 7$ ) and control ( $n = 7$ ) mice. \* $P < 0.05$ , \*\* $P < 0.01$ . All experiments were repeated at least three times and representative results are shown.

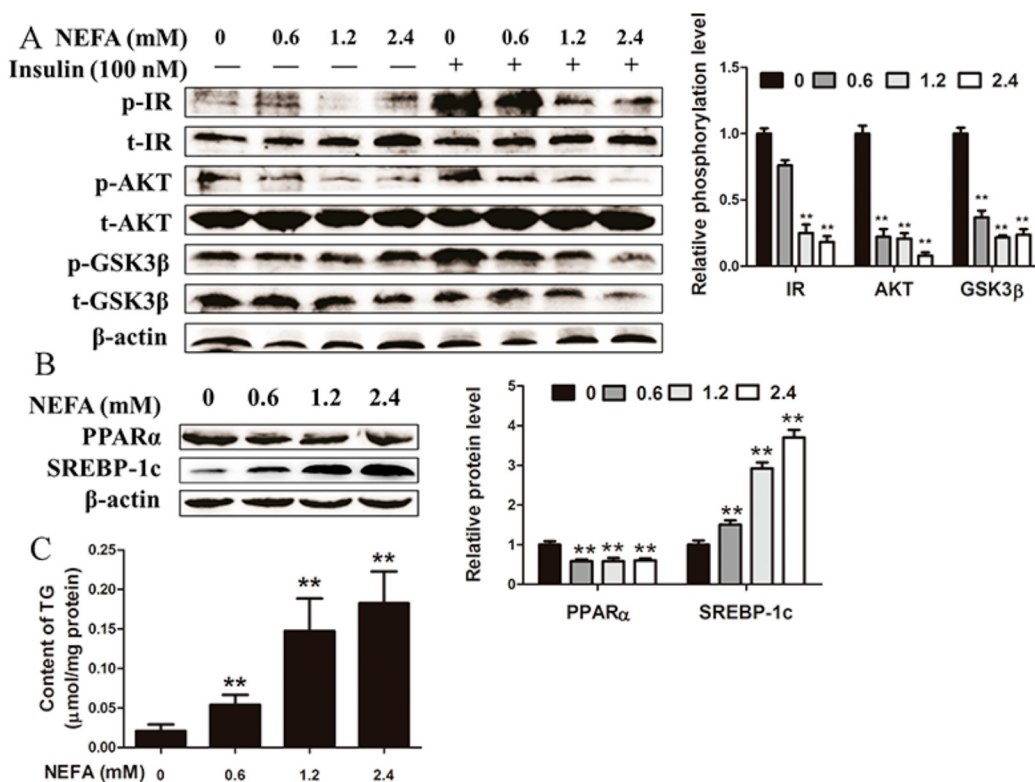

**Supplementary Figure 3: High NEFA concentrations impair insulin signaling and lipid metabolism *in vitro*.** (A) Immunoblot analysis (left) and quantification (right) of insulin-stimulated phosphorylation of IR, Akt, GSK3β protein levels in hepatocytes. (B) Immunoblot analysis (left) and quantification (right) of SREBP-1c and PPARα protein levels in hepatocytes. (C) TG content in hepatocytes. \**P* < 0.05, \*\**P* < 0.01. All experiments were repeated at least three times and representative results are shown.

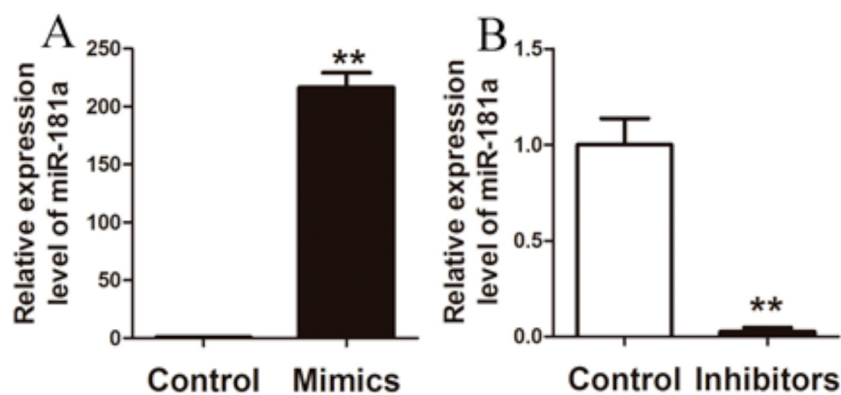

**Supplementary Figure 4: Expression of miR-181a in dairy cow hepatocytes transfected with miR-181a mimics or inhibitors.** \**P* < 0.05, \*\**P* < 0.01. All experiments were repeated at least three times and representative results are shown. (A) Hepatocytes were transfected with 10 nM miR-181a mimics or negative controls. (B) Hepatocytes were transfected with 50 nM miR-181a inhibitors or negative controls.

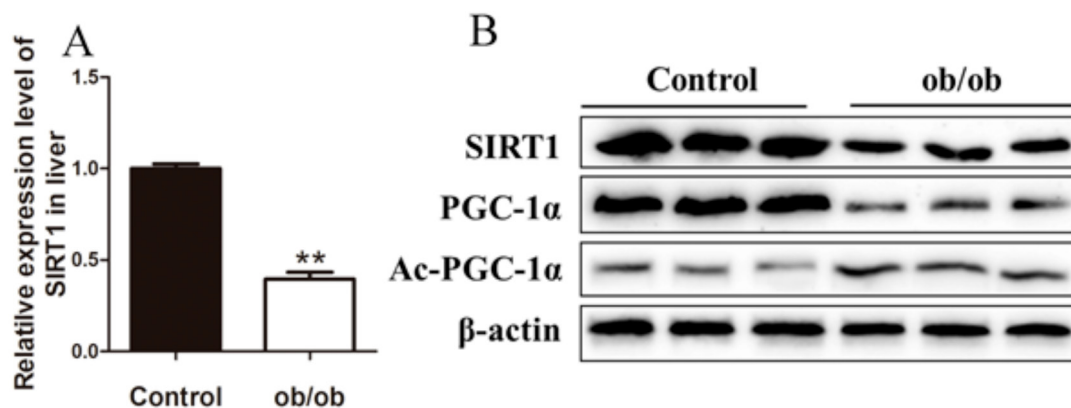

**Supplementary Figure 5: The expression of SIRT1, PGC-1 $\alpha$  and Ac-PGC-1 $\alpha$  in the liver of ob/ob mice.** (A) The mRNA expression level of SIRT1 in the liver of ob/ob ( $n = 7$ ) and control ( $n = 8$ ) mice. (B) Immunoblot analysis of SIRT1, PGC-1 $\alpha$  and acetylated PGC-1 $\alpha$  in the liver of ob/ob ( $n = 7$ ) and control ( $n = 7$ ) mice. \* $P < 0.05$ , \*\* $P < 0.01$ . All experiments were repeated at least three times and representative results are shown.

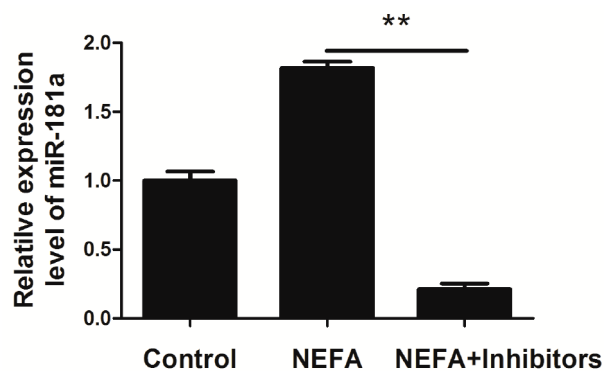

**Supplementary Figure 6: The expression level of miR-181a in hepatocytes.** Hepatocytes were divided into 3 groups as follows: a control group (transfected with 50 nM negative control), NEFA group (treated with 1.2 mM NEFA), and miR-181a + NEFA group (transfected with 50 nM miR-181a inhibitors and then treated with 1.2 mM NEFA). \* $P < 0.05$ , \*\* $P < 0.01$ . All experiments were repeated at least three times and representative results are shown.

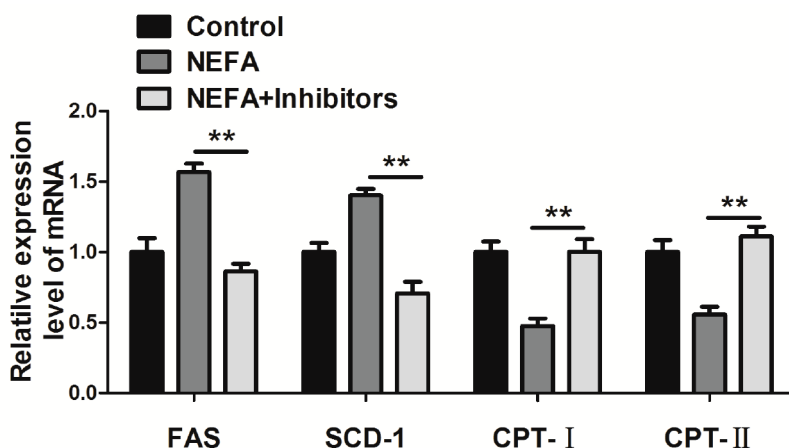

**Supplementary Figure 7: The expression levels lipid metabolism genes in hepatocytes.** Hepatocytes were divided into 3 groups as follows: a control group (transfected with 50 nM negative control), NEFA group (treated with 1.2 mM NEFA), and miR-181a + NEFA group (transfected with 50 nM miR-181a inhibitors and then treated with 1.2 mM NEFA). \* $P < 0.05$ , \*\* $P < 0.01$ . All experiments were repeated at least three times and representative results are shown.

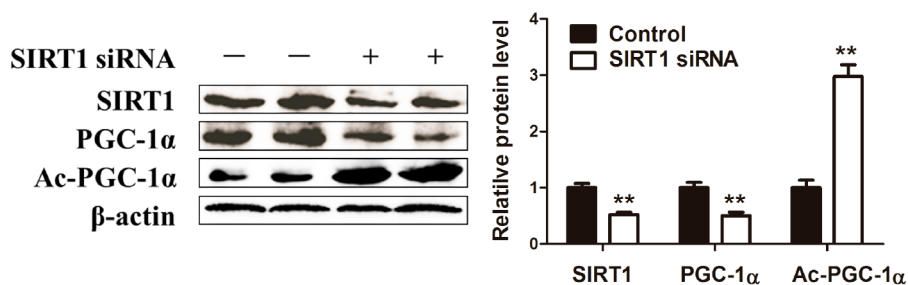

**Supplementary Figure 8: Immunoblot analysis (left) and quantification (right) of SIRT1, PGC-1α and acetylated PGC-1α in hepatocytes.** Hepatocytes were transfected with SIRT1 siRNA for 48 h and then harvested for WB. \* $P < 0.05$ , \*\* $P < 0.01$ . All experiments were repeated at least three times and representative results are shown.

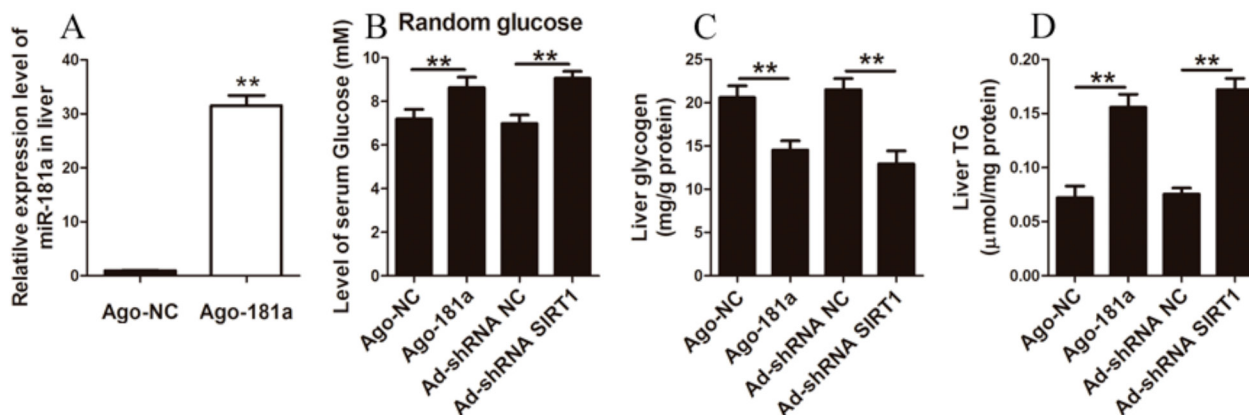

**Supplementary Figure 9: Overexpression of miR-181a or knockdown of SIRT1 impairs glucose and lipid metabolism *in vivo*.** (A) Relative miR-181a expression levels in the livers of mice injected with Ago-181a ( $n = 8$ ) or Ago-NC ( $n = 8$ ). (B) Random blood glucose levels of mice injected with Ago-181a ( $n = 7$ ) or Ago-NC ( $n = 7$ ) or Ad-shRNA NC ( $n = 8$ ) or Ad-shRNA SIRT1 ( $n = 8$ ). (C) The glycogen contents in the liver of mice injected with Ago-181a ( $n = 7$ ) or Ago-NC ( $n = 7$ ) or Ad-shRNA NC ( $n = 8$ ) or Ad-shRNA SIRT1 ( $n = 8$ ). (D) Liver TG contents in the mice injected with Ago-181a ( $n = 7$ ) or Ago-NC ( $n = 7$ ) or Ad-shRNA NC ( $n = 8$ ) or Ad-shRNA SIRT1 ( $n = 8$ ). \* $P < 0.05$ , \*\* $P < 0.01$ . All experiments were repeated at least three times and representative results are shown.

**Supplementary Table 1: Basic description of the subjects (mean  $\pm$  SD)**

| Variables                    | Control (n=15)   | NAFLD (n=25)       |
|------------------------------|------------------|--------------------|
| Age (years)                  | 47.2 $\pm$ 4.94  | 46.23 $\pm$ 8.45   |
| Females/males                | 8/7              | 15/10              |
| BMI (kg/m <sup>2</sup> )     | 22.59 $\pm$ 1.47 | 29.88 $\pm$ 1.3**  |
| NEFA (mM)                    | 0.29 $\pm$ 0.08  | 0.96 $\pm$ 0.1**   |
| Glucose (mM)                 | 4.61 $\pm$ 0.46  | 5.87 $\pm$ 0.44**  |
| Insulin (mU/L)               | 4.78 $\pm$ 0.52  | 11.00 $\pm$ 1.89** |
| HbA <sub>1c</sub> (%)        | 4.96 $\pm$ 0.61  | 7.83 $\pm$ 0.8**   |
| HbA <sub>1c</sub> (mmol/mol) | 30.6 $\pm$ 6.67  | 62.08 $\pm$ 8.76** |
| HOMA-IR                      | 0.97 $\pm$ 0.14  | 2.84 $\pm$ 0.41**  |
| TG (mM)                      | 1.18 $\pm$ 0.25  | 2.34 $\pm$ 0.35**  |
| ALT (IU/L)                   | 22 $\pm$ 4.31    | 63.62 $\pm$ 8.21** |
| AST (IU/L)                   | 18.50 $\pm$ 3.26 | 51.08 $\pm$ 5.08** |
| $\gamma$ -GT (IU/L)          | 25.3 $\pm$ 5.02  | 91.84 $\pm$ 5.68** |

\* $p$ <0.05 and \*\* $p$ <0.01 compared with control. BMI, Body mass index; HbA<sub>1c</sub>, Hemoglobin A<sub>1c</sub>; HOMA-IR, homeostasis model assessment of insulin resistance; TG, triglyceride; ALT, alanine aminotransferase; AST, aspartate transaminase;  $\gamma$ -GT, gamma-glutamyl transpeptidase.

**Supplementary Table 2: Basic description of the dairy cows with NAFLD and controls (mean  $\pm$  SD)**

| Variables             | Control (n=20)     | NAFLD (n=20)         |
|-----------------------|--------------------|----------------------|
| Body weight (Kg)      | 562.26 $\pm$ 18.81 | 590.51 $\pm$ 15.82** |
| Body condition scores | 2.59 $\pm$ 0.14    | 3.25 $\pm$ 0.25**    |
| NEFA (mM)             | 0.27 $\pm$ 0.09    | 1.14 $\pm$ 0.2**     |
| Glucose (mM)          | 3.82 $\pm$ 0.23    | 4.33 $\pm$ 0.27**    |
| Insulin (mU/L)        | 15.29 $\pm$ 1.08   | 22.19 $\pm$ 1.67**   |
| ALT (IU/L)            | 20.81 $\pm$ 2.71   | 36.80 $\pm$ 4.46**   |
| AST (IU/L)            | 42.85 $\pm$ 3.4    | 103.87 $\pm$ 10.98** |
| $\gamma$ -GT (IU/L)   | 19.59 $\pm$ 2.97   | 28.26 $\pm$ 1.79**   |

\* $p$ <0.05 and \*\* $p$ <0.01 compared with healthy cows. NEFA, non-esterified fatty acids; ALT, Alanine aminotransferase; AST, Aspartate transaminase;  $\gamma$ -GT, gamma-glutamyl transpeptidase.

**Supplementary Table 3: Primers for Real-time PCR**

See Supplementary File 1
